# Supplementary material
Source: PubMed Central journal article supplement (PMC5391737)
Supplement: 10.1074_C117.777730_jbc.C117.777730-1.pdf [file 10.1074_C117.777730_jbc.C117.777730-1.pdf]

Figure S1: Analysis of Small RNA sequencing data

| Genotype | Input reads | rRNA reads (2 mismatches) | Reads perfectly matching to the genome (non-rRNA) | Genome Collapsed Reads | Genome unique mapping reads | Transposon mapping reads (Unique) | Normalized transposon reads (Unique) |
|----------|-------------|---------------------------|---------------------------------------------------|------------------------|-----------------------------|-----------------------------------|--------------------------------------|
| Control  | 10526656    | 541800                    | 8100473                                           | 1410100                | 414166                      | 560892                            | 560892                               |
| Hop GLKD | 9197807     | 5388073                   | 788928                                            | 239139                 | 113138                      | 71373                             | 261225                               |

Normalization factor

3.66

| Genome collapsed reads mapping to coding portion of the genome | Transposon mapping reads (Unique) | Normalized transposon reads (Unique) |
|----------------------------------------------------------------|-----------------------------------|--------------------------------------|
| 220763                                                         | 560892                            | 560892                               |
| 100429                                                         | 71373                             | 157021                               |

Normalization factor

2.2

Figure S1
